# Supplementary material for: Plasmon Hybridizations in Compound Nanorod–Nanohole Arrays
Source: MDPI journal article supplement (doi:10.3390/nano13142135), 2023-07-23
Supplement: s1 [file s1]

## Supplementary Materials

### Plasmon Hybridizations in Compound Nanorod–Nanohole Arrays

Shahab Razavi and Yiping Zhao

Department of Physics and Astronomy, University of Georgia, Athens, GA 30602, USA

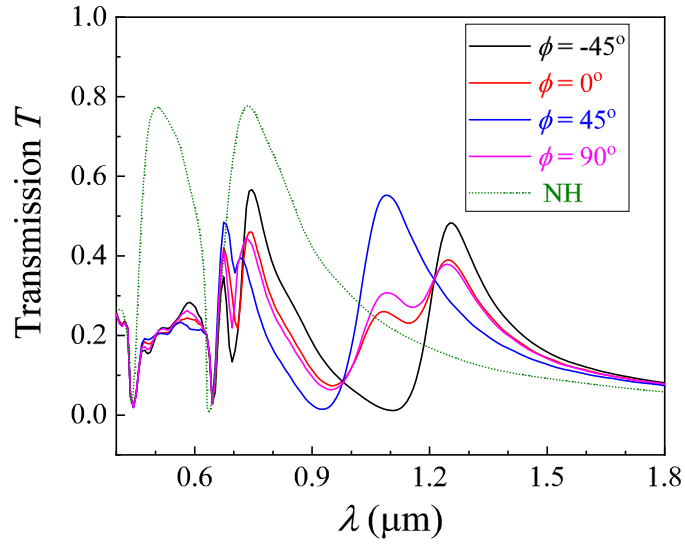

**Figure S1.** The original transmission spectra for **Figure 2a**.

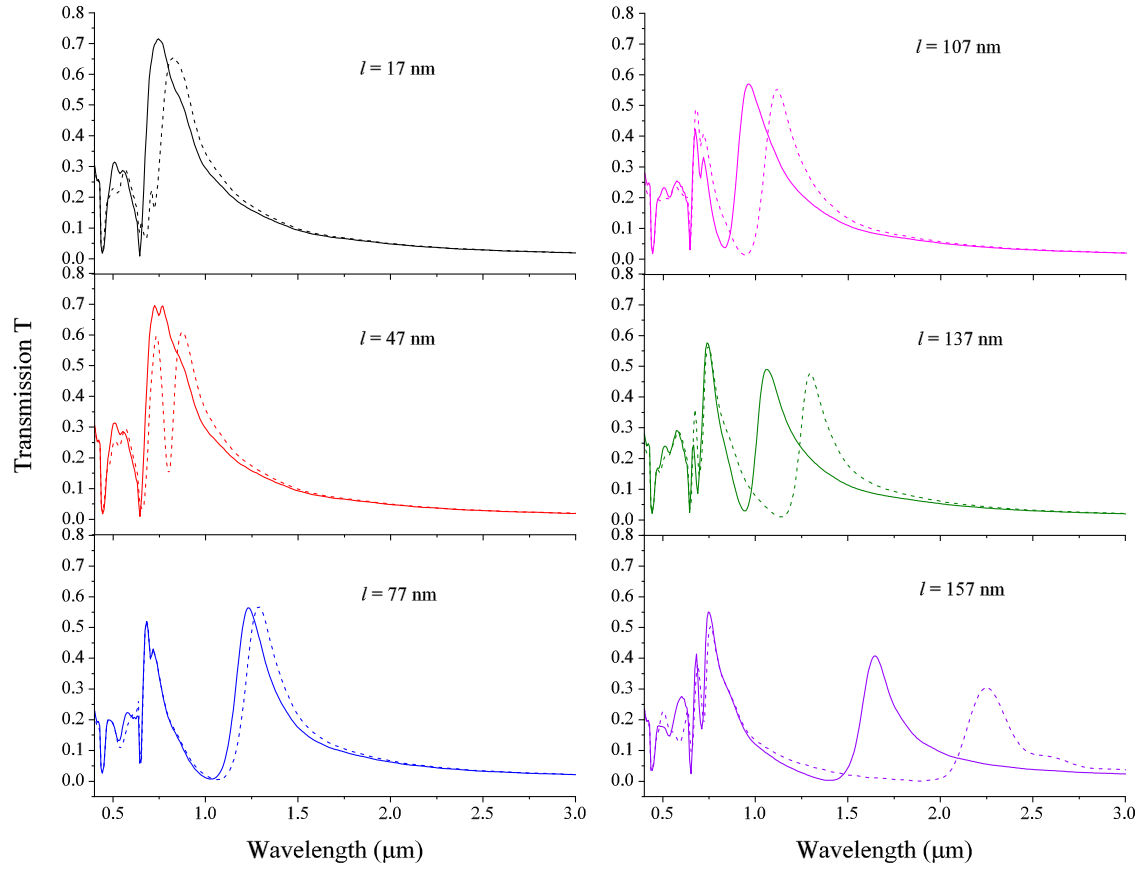

**Figure S2.** The original transmission spectra for **Figure 3a**.

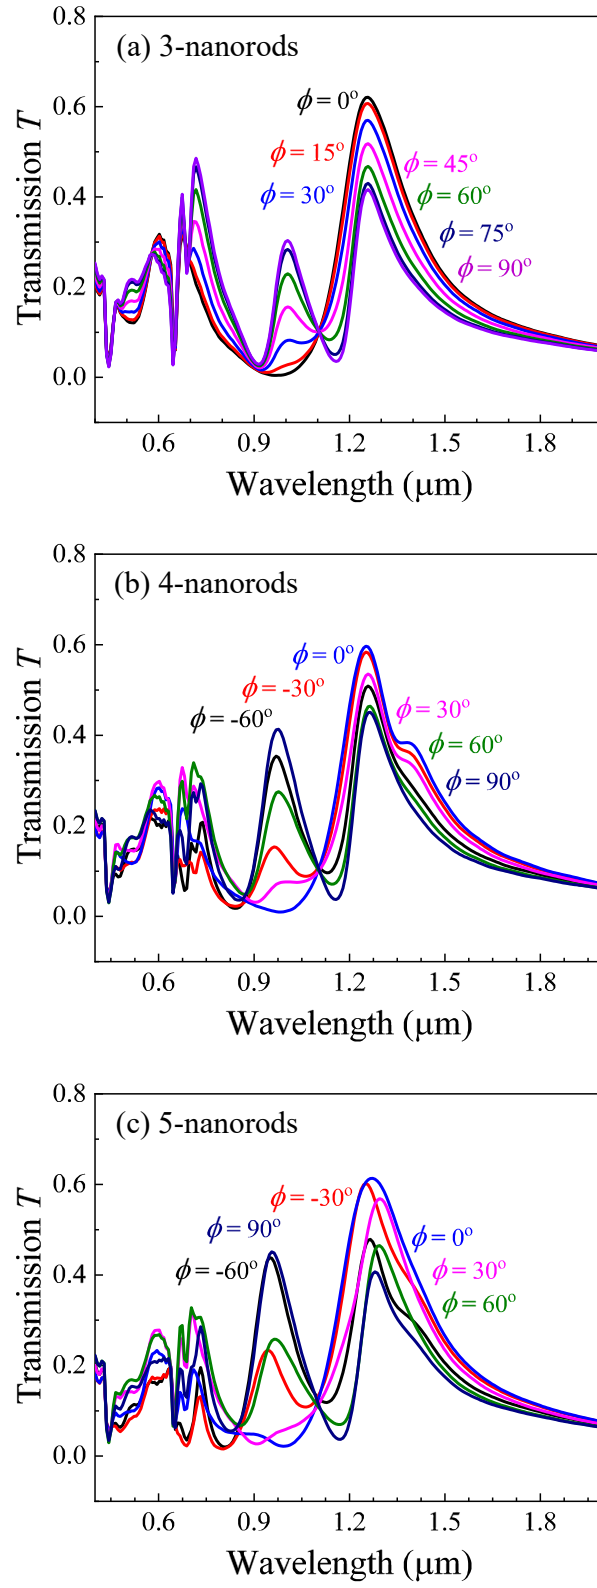

**Figure S3.** The original transmission spectra for **Figure 5**.
